# Supplementary material
Source: publisher figshare collection journal article supplement (https://sage.figshare.com/ndownloader/files/20467941)
Supplement: Supplementary file 1 [file 20467941]

**Appendix A**

*Database search strategy*


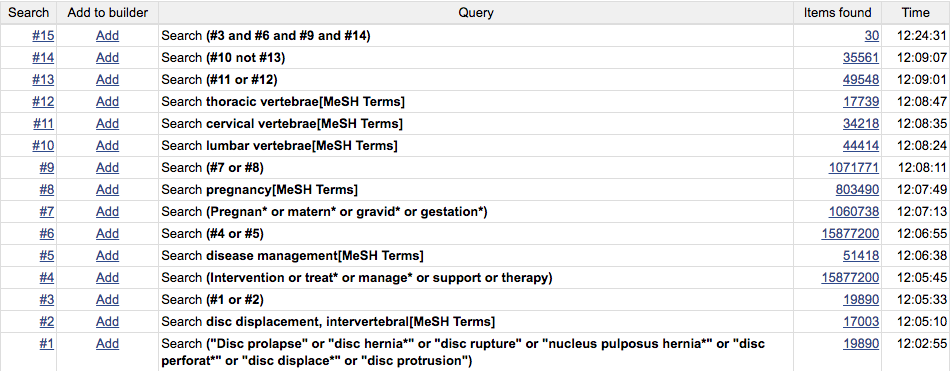


**Figure A1** Literature search strategy for PubMed. Each line represents one aspect of the final search or a combination of lines. Search 15 represents the complete and final search.

**Appendix B**

*Joanna Critical Appraisal Tool*

**Figure B1** The Joanna Briggs Institute critical appraisal tool for Case Reports


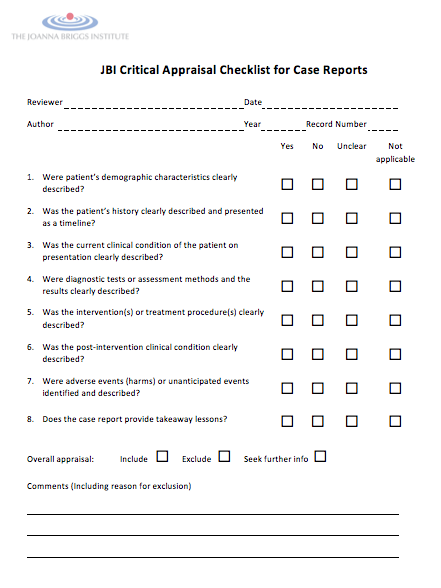


**Appendix C**

*Study characteristics*


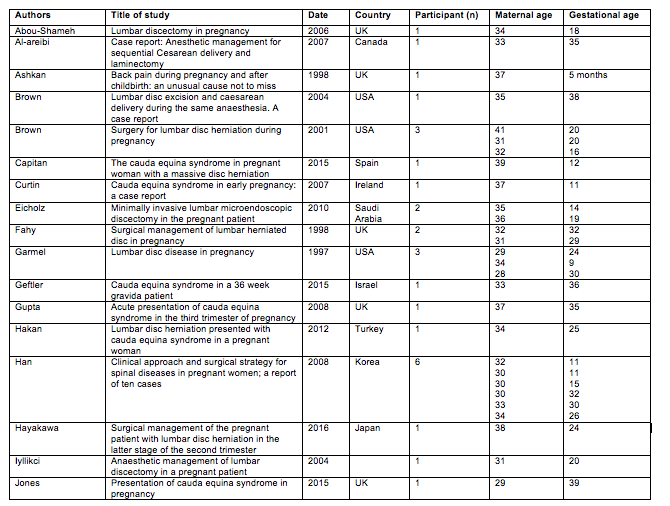


**Figure C1** A table illustrating study and patient demographics for the individual studies used in this review


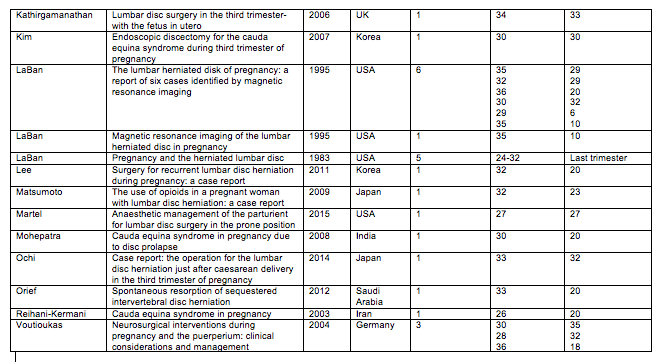


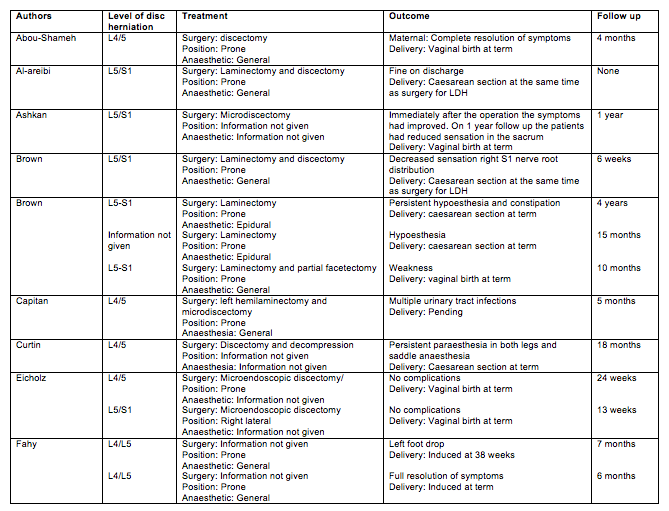


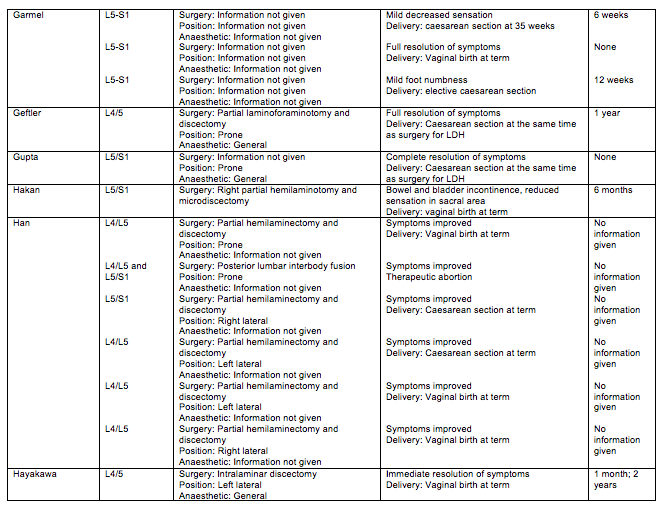


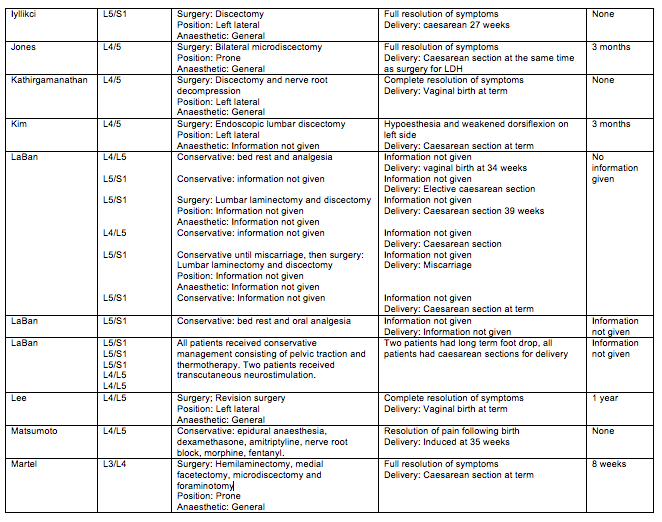


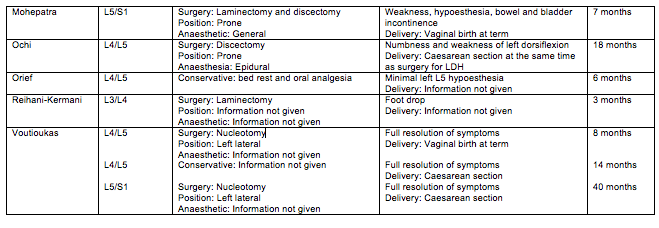


**Figure C1** A table illustrating the management of patients in the individual studies, including treatment, outcomes and time until follow up
